# Supplementary material
Source: Research Square preprint supplement (doi:10.21203/rs.3.rs-8633555/v1)
Supplement: Supplementary file 1 [file 965644d3d2da89565163e266.docx]

**Questionnaire**

**Clinical Instructors as Role Models in Career Choice**

**Clinical Instructor is (Specialist, Registrar or TA responsible of teaching in dental clinic)**

**Role Model is (a person considered as a standard of excellence to be imitated)**

Section 2 of 6

**Demographic Data**

**Gender**

Male

Female

**Level of study**

4th year

5th year

**Do you consider any of your clinical instructors as Role Models?**

Yes

No

**If YES, please specify in which department**

Oral Maxillofacial surgery

Orthodontics

Periodontology

Conservative Department

Pediatric Dentistry

Prosthodontics

**Does this role model have a positive effect on your future decision of career choice?**

Yes

No

I don't know

**Clinical skills**

**Please rank each of these characteristics as you think important in selecting a role model**

**The role model should have good communication skills with patients and their families**

Not important

Mildly important

Very important

**The role model should have good diagnosis skills**

Not important

Mildly important

Very important

**The role model should be able to perform various procedures**

Not important

Mildly important

Very important

Section 5 of 6

**Personal Qualities**

**Please rank each of these characteristics as you think important in selecting a role model**

**The role model should be compassionate for patients and their families**

Not important

Mildly important

Very important

**The role model should demonstrate leadership qualities.**

Very important

Not important

Mildly important

**The role model should demonstrate good general appearance.**

Not important

Mildly important

Very important

**Section 6 of 6**

**Teaching Skills**

**Please rank each of these characteristics as you think important in selecting a role model**

**The role model should make difficult topics more easy to understand**

Not important

Mildly important

Very important

**The role model should deliver interactive teaching.**

Not important

Mildly important

Very important

**The role model should have strong knowledge in his\her specialty**

Not important

Mildly important

Very important
